# Supplementary material
Source: PubMed Central journal article supplement (PMC3316650)
Supplement: supp_111.133173_FigureS1.pdf [file supp_111.133173_FigureS1.pdf]

```

EMB-9A 1531: AP--SRGFTFAKHSQTTAVPQCPPGASQLWEGYSLLYVQGNRASGQDLGQPGSCLSKFN 1588
Hs α1(IV) 1440: -PSVDHGFLVTRHSQTIDDPQCPSGTKILYHGYSLLYVQGNtk75ERAHGQDLGTAGSCLRKFS 1498

EMB-9A 1589: TMPFMFCNMNSVCHVSSRNDYSFWLSTDEPMTMMPNPVTGTAIRPYISRCVCEVPTQII 1648
Hs α1(IV) 1499: TMPFLEFCNINNVCFASRNDYSYWLSTPEPMPMSMAFITGENIRPFISRCVCEAFAMVM 1558

EMB-9A 1649: AVHSQDTSVPQCPCQGWSGMWTGYSFVMHTAAGAEGTGQSLQSPGSCLEEFRAVVFIECHG 1708
Hs α1(IV) 1559: AVHSQTIQIPPCPSGWSSIWIGYSFVMHTSAGAEGSGQALASPGSCLEEFRSAPFIECHG 1618

EMB-9A 1709: RGTCNYYATNHGFWLSIVDQDKQFRKPMSTLKGGLKDRVSRQCVCtk75LKNR 1759
Hs α1(IV) 1619: RGTCNYYANAYSFWLATIERSEMFKKPTPSTLKGELRTHVSRQCVMRRT 1669

```

**Figure S1** EMB-9(*tk75*) has a substitution at an evolutionarily conserved amino acid in the NC1 domain. Alignment of the C-terminal NC1 domain sequences of the type IV collagen  $\alpha 1$  chains of *C. elegans* (EMB-9) and humans [Hs  $\alpha 1$  (IV)]. The amino acids in the trimer-trimer interface region (Sundaramoorthy *et al.* 2002) are underlined in magenta. Identical amino acids are boxed (black). The mutated glycine in *tk75* is indicated.
