# Supplementary material
Source: PubMed Central journal article supplement (PMC3316650)
Supplement: supp_111.133173_FigureS2.pdf [file supp_111.133173_FigureS2.pdf]

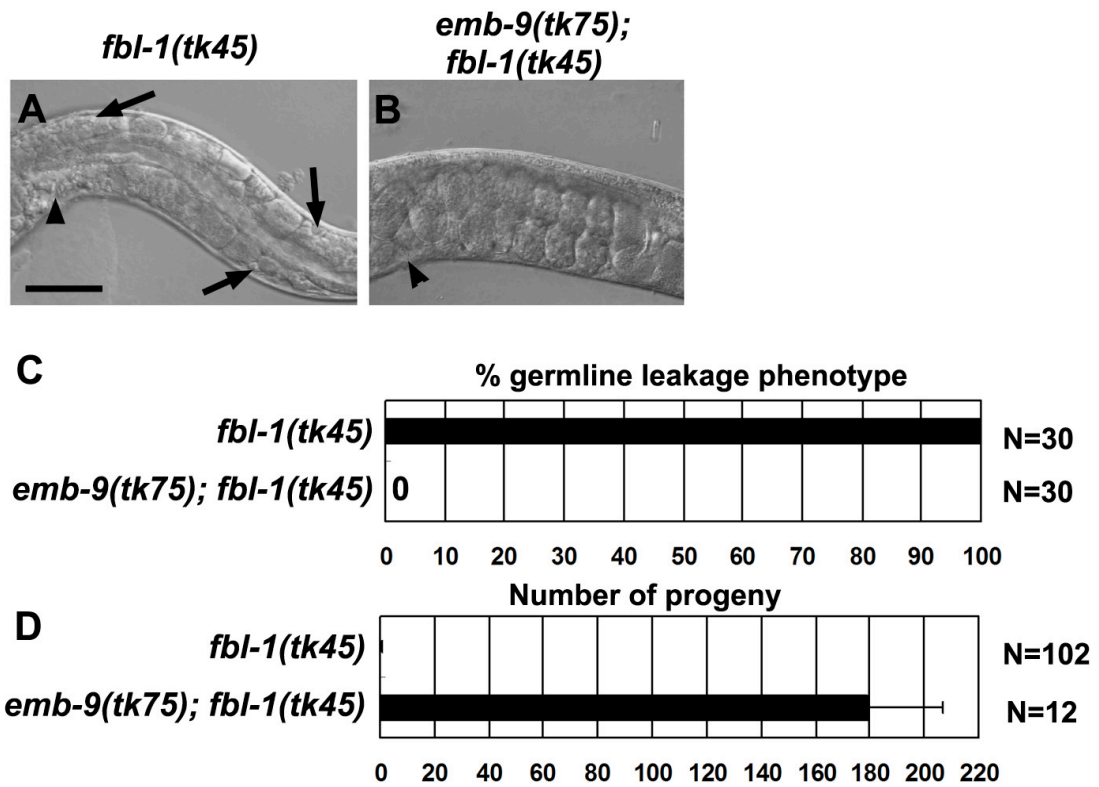

**Figure S2** Germ line phenotype. (A) The germ cells (arrows) were released into the body cavity in 1-day-old *fbl-1(tk45)* adult hermaphrodites, probably because of the defects in the BM. (B) This phenotype was not observed in 1-day-old *emb-9(tk75); fbl-1(tk45)* adult hermaphrodites. Arrowheads point to the vulvae. Scale bar, 25  $\mu$ m. Quantification of the germ line phenotype (C), n = 30. One-day-old adult hermaphrodites were scored for the presence of germ cells in the body cavity by Nomarski microscopy; Quantification of brood sizes (D), n = 102 for *fbl-1(tk45)* and n = 12 for *emb-9(tk75); fbl-1(tk45)*. Brood size is the number of hatched larvae from eggs laid by an adult hermaphrodite during 72 hours.
