# Supplementary material
Source: PubMed Central journal article supplement (PMC3316650)
Supplement: supp_111.133173_FigureS3.pdf [file supp_111.133173_FigureS3.pdf]

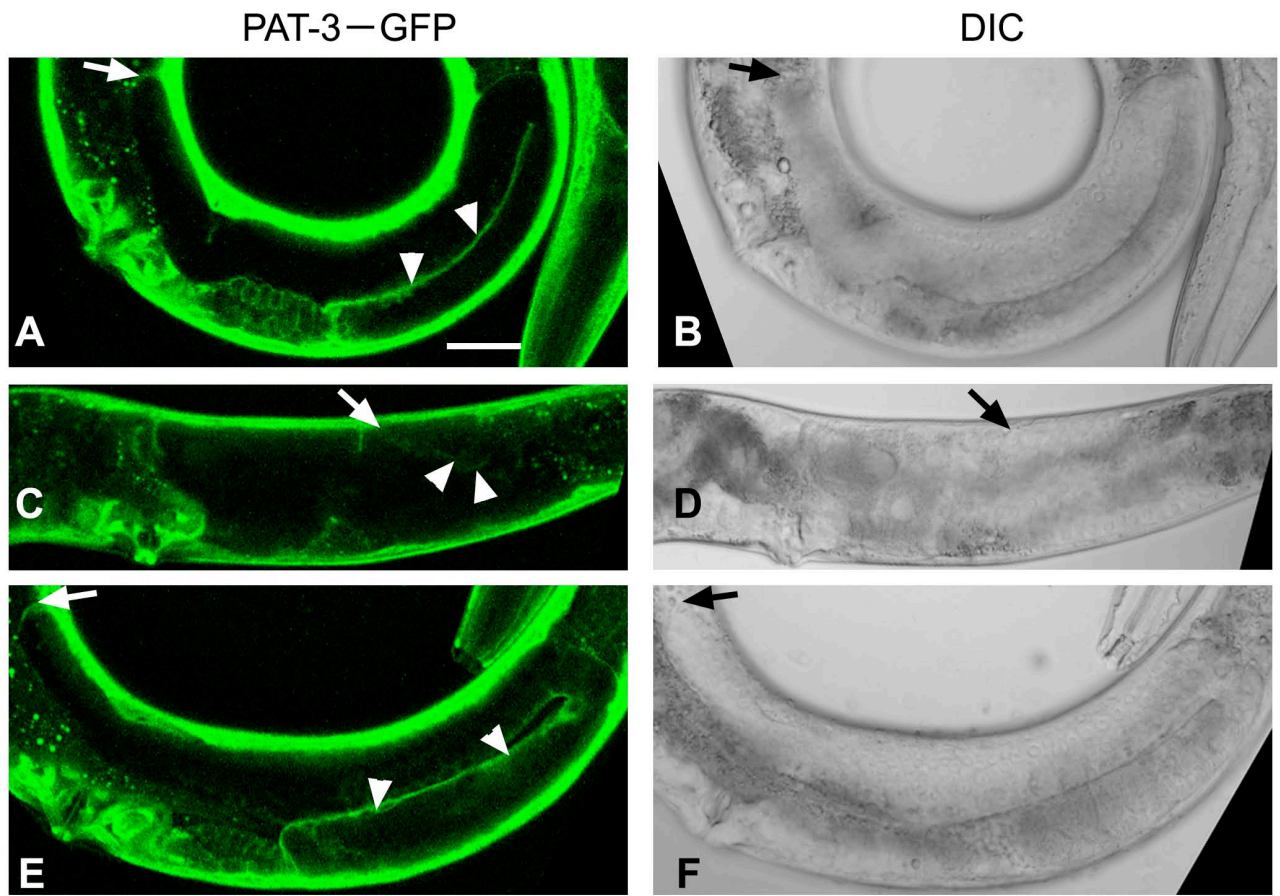

**Figure S3** PAT-3-GFP expression in the gonadal sheath cells. Confocal (A, C, E) and Nomarski (B, D, F) images of posterior gonads of wild-type (A, B), *fbl-1(tk45)* (C, D), and *emb-9(tk75); fbl-1(tk45)* (E, F) young adult hermaphrodites expressing PAT-3-GFP. Arrows indicate PAT-3-GFP expression in DTCs. Arrowheads indicate PAT-3-GFP expression in gonadal sheath cells. The weakened PAT-3-GFP expression in DTCs and sheath cells in *fbl-1(tk45)* animals (C, D) recovered to wild-type levels in *emb-9(tk75); fbl-1(tk45)* animals (E, F). All images were captured under the same conditions. Scale bar, 25  $\mu$ m.
