# Supplementary material
Source: PubMed Central journal article supplement (PMC3316650)
Supplement: supp_111.133173_FigureS5.pdf [file supp_111.133173_FigureS5.pdf]

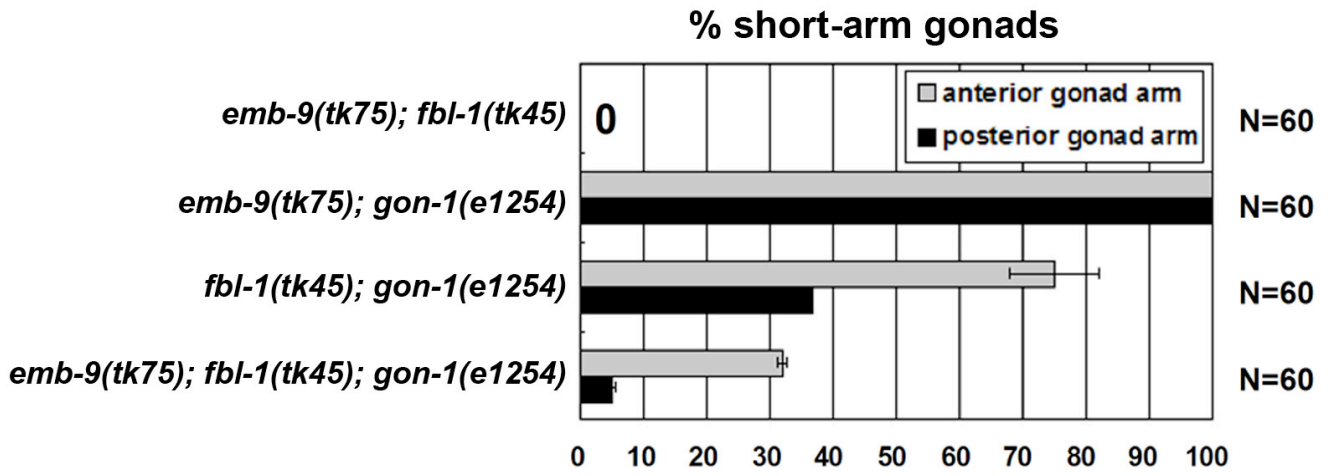

**Figure S5** Gonadal elongation defects in the *emb-9(tk75); fbl-1(tk45); gon-1(e1254)* triple mutants  
 Data for double mutants are included for comparison.
