# Supplementary material
Source: PubMed Central journal article supplement (PMC3316650)
Supplement: supp_111.133173_FileS1.pdf [file supp_111.133173_FileS1.pdf]

## LITERATURE CITED

- Baum, P. D., and G. Garriga, 1997 Neuronal migrations and axon fasciculation are disrupted in *ina-1* integrin mutants. *Neuron* **19**: 51-62.
- Blelloch, R., S. S. Anna-Arriola, D. Gao, Y. Li, J. Hodgkin *et al.* 1999 The *gon-1* gene is required for gonadal morphogenesis in *Caenorhabditis elegans*. *Dev.Biol.* **216**: 382-393.
- Sundaramoorthy, M., M. Meiyappan, P. Todd, and B. G. Hudson, 2002 Crystal structure of NC1 domains. Structural basis for type IV collagen assembly in basement membranes. *J.Biol.Chem.* **277**: 31142-31153.
